# Supplementary material
Source: HighWire-hosted journal article supplement (http://ghspjournal.org/highwire/filestream/5017/field_highwire_adjunct_files/0/GHSP-D-21-00124-Supplement.pdf)
Supplement: GHSP-D-21-00124-Supplement.pdf [file GHSP-D-21-00124-Supplement.pdf]

Supplement to: Abdel Tawab N, Tobey E, Essam M, Chace Dwyer S, Jain A. Evaluation of 2 intervention models to integrate family planning into worker health and livelihood programs in Egypt: a difference-in-differences analysis. *Glob Health Sci Pract.* 2021;9(4).  
<https://doi.org/10.9745/GHSP-D-21-00-124>

Supplement Table 1. Intervention characteristics in Souhag and Port Said

|                                | Souhag                                                                                                                                                                                                                                                                                                                                 | Port Said                                                                                                                                                                                                                                                                                                                                   |
|--------------------------------|----------------------------------------------------------------------------------------------------------------------------------------------------------------------------------------------------------------------------------------------------------------------------------------------------------------------------------------|---------------------------------------------------------------------------------------------------------------------------------------------------------------------------------------------------------------------------------------------------------------------------------------------------------------------------------------------|
| Intervention model             | Integration of FP/RH into livelihood training                                                                                                                                                                                                                                                                                          | Integration of FP/RH into worker health programs                                                                                                                                                                                                                                                                                            |
| Participant Selection Criteria | Urban male and female job seekers aged 18-35 who have completed at least primary education.                                                                                                                                                                                                                                            | Male and female garment factory workers aged 18-35 who are literate.                                                                                                                                                                                                                                                                        |
| Location of intervention       | Workshops offered to participants in six districts in urban Souhag                                                                                                                                                                                                                                                                     | Five garment factories in the Free Investment Zone                                                                                                                                                                                                                                                                                          |
| Recruitment procedures         | Announcement for a 5-day training shared by WAHI staff and beneficiaries' networks. Interested young people who fulfilled selection criteria were notified of the workshop start date.                                                                                                                                                 | Trained peer educators received a list of names of factory workers whom s/he was assigned to. Those workers were 18-35 years old and were literate. The number of workers on the list ranged from 40 –100 depending on the size of factory.                                                                                                 |
| Components of the intervention | <p>Trained male and female peer educators (PEs) offered a five-day integrated FP livelihood training workshop and shared SBCC materials with participants.</p> <p>Participants were given a list of names and contact information of private sector service providers who had been trained by the project in FP service provision.</p> | <p>Trained PEs shared messages with their fellow workers through face to face communication and SBCC materials and referred those who needed additional FP/RH information to the trained factory infirmiry nurse.</p> <p>Factory infirmiry nurse referred those who needed a FP/RH service to trained private sector private providers.</p> |

Supplement to: Abdel Tawab N, Tobey E, Essam M, Chace Dwyer S, Jain A. Evaluation of 2 intervention models to integrate family planning into worker health and livelihood programs in Egypt: a difference-in-differences analysis. *Glob Health Sci Pract.* 2021;9(4).  
<https://doi.org/10.9745/GHSP-D-21-00-124>

Supplement Table 2. Study design in Souhag and Port Said

|                                      | Souhag                                                                                                                                                   | Port Said                                                                                                          |
|--------------------------------------|----------------------------------------------------------------------------------------------------------------------------------------------------------|--------------------------------------------------------------------------------------------------------------------|
| Design                               | Cross sectional                                                                                                                                          | Cross sectional                                                                                                    |
| Intervention group                   | Young men and women aged 18-35 who attended the five-day integrated livelihood and FP/RH training                                                        | Factory workers aged 18-35 employed in five intervention factories where the Youth Health Project was implemented. |
| Comparison group                     | Young men and women of the same age who did not participate in the intervention.                                                                         | Factory workers employed in the factories where the Youth Health Project was not conducted.                        |
| Recruitment of research participants | WAHI obtained participants' phone numbers during workshop registration (30-40 days before workshop)                                                      | Facility managers provided the research team with a database of all factory workers' phone numbers.                |
| Recruitment of comparison group      | Random digit dialing in urban Souhag                                                                                                                     | Managers from two comparison factories provided the research team with a database of employees' phone numbers.     |
| Sample of research participants      | 1,519 phone interviews (778 at baseline and 741 at endline)                                                                                              | 1,958 phone interviews (1,145 at baseline and 813 at endline)                                                      |
| Sample of comparison group           | 1,082 phone interviews (699 at baseline and 383 at endline)                                                                                              | 1,047 phone interviews (621 at baseline and 426 at endline)                                                        |
| Baseline                             | October 2017 to March 2018<br><br>Data collectors were given a list of phone numbers and asked to interview at baseline (before the workshop took place) | September 2017 to September 2018                                                                                   |
| Endline                              | March 2018 to September 2018<br><br>Data collectors were given a list of phone numbers and asked to interview at endline (3-6 months after workshop)     | August 2018 to March 2019                                                                                          |
